# Supplementary material
Source: publisher figshare collection journal article supplement (https://frontiersin.figshare.com/ndownloader/files/22859054)
Supplement: Supplementary file [file 22859054]

## TABLE OF CONTENTS

|                                                                                                                                                     |    |
|-----------------------------------------------------------------------------------------------------------------------------------------------------|----|
| <b>Supplementary Figure 1.</b> S100A9 and S100A12 protein expression in primary human macrophages..                                                 | 2  |
| <b>Supplementary Figure 2.</b> PBMCs from diabetic patients and healthy controls were analysed by flow cytometry.....                               | 3  |
| <b>Supplementary Figure 3.</b> Classical, intermediate and non-classical monocytes subsets from T2D patients with microvascular complications ..... | 4  |
| <b>Supplementary Figure 4.</b> Relation H3 occupancy and gene expression depends on promoter region in M1 macrophages. ....                         | 5  |
| <b>Supplementary Figure 5.</b> Modifications of histones at promoter regions in transient hyperglycemia. 6                                          |    |
| <b>Supplementary Figure 6.</b> Scatter plot with bar presenting individual donor data for main Figure 8. ..                                         | 7  |
| <b>Supplementary Table 1.</b> S100 gene family by affymetrix .....                                                                                  | 8  |
| <b>Supplementary Table 2.</b> Characteristics of individuals according to patient diagnosis.....                                                    | 9  |
| <b>Supplementary Table 3.</b> Correlation between <i>S100A9</i> and <i>S100A12</i> expression in monocytes.....                                     | 10 |
| <b>Supplementary Table 4.</b> Clinical characteristics of the patients and control individuals. ....                                                | 11 |
| <b>Supplementary Table 5.</b> Key Resource Table .....                                                                                              | 12 |

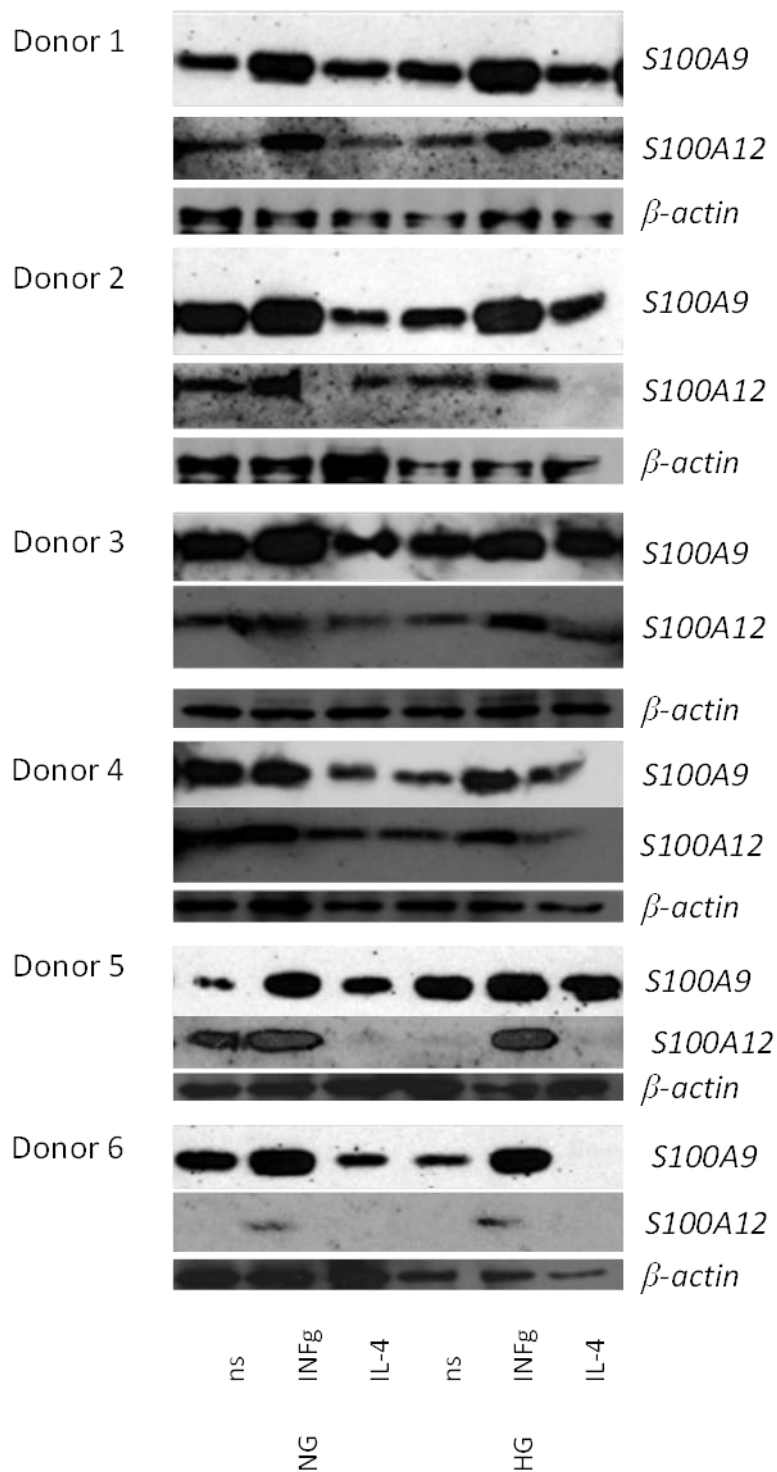

**Supplementary Figure 1.** S100A9 and S100A12 protein expression in primary human macrophages. Western Blot analysis of protein expression S100A9 and S100A12 (n=6) in M0, M1 and M2 macrophages cultured for 6 days cultured under normal (NG) and high glucose (HG) conditions.

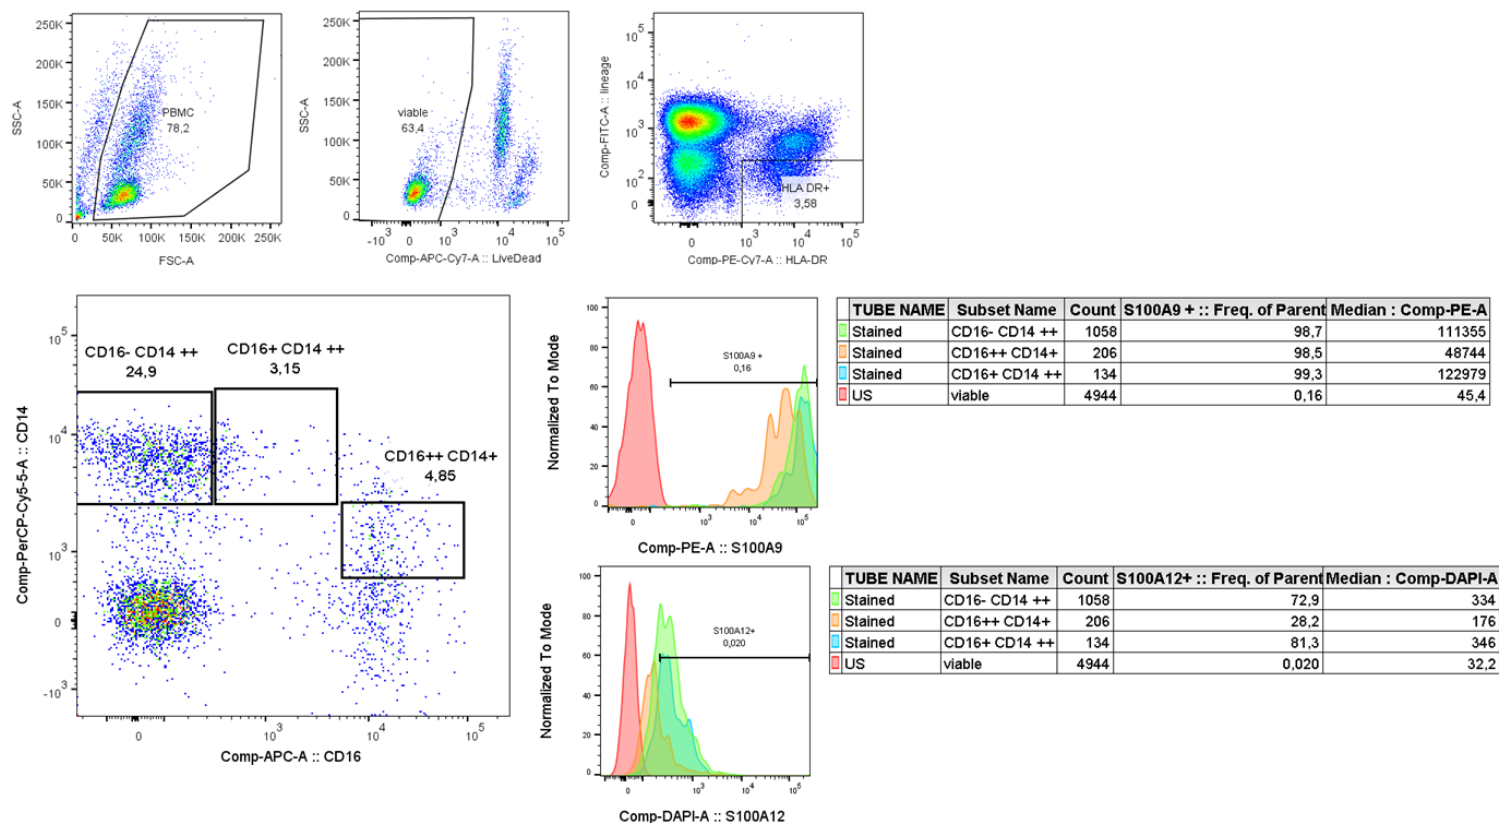

**Supplementary Figure 2.** PBMCs from diabetic patients and healthy controls were analysed by flow cytometry. Cells positive for HLA-DR were selected and all cells expressing CD3, CD19 and CD56 were excluded. Using a scatter plot of CD16 versus CD14 monocyte population were separated into classical (CD14+CD16-), non-classical with low CD14 expression (CD14-CD16+) and intermediate (CD14+CD16+) monocytes. These populations were analysed for the expression S100A9 and S100A12.

**A**

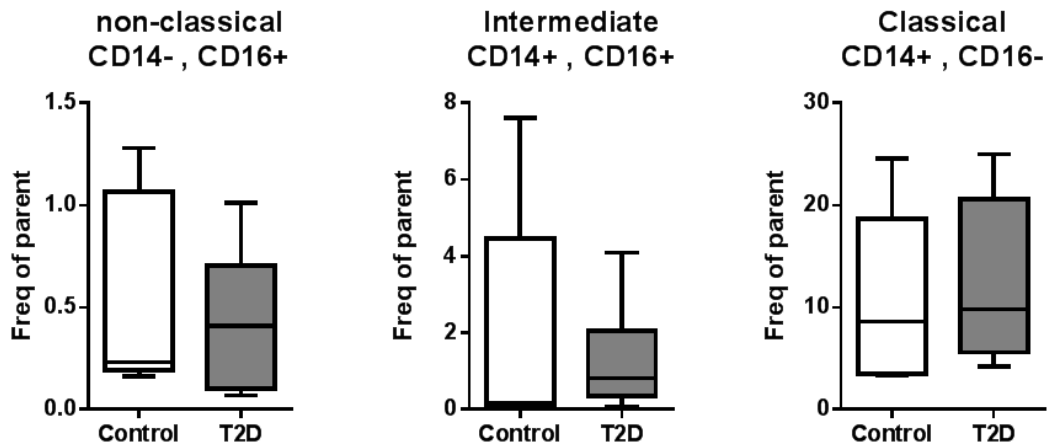

**B**

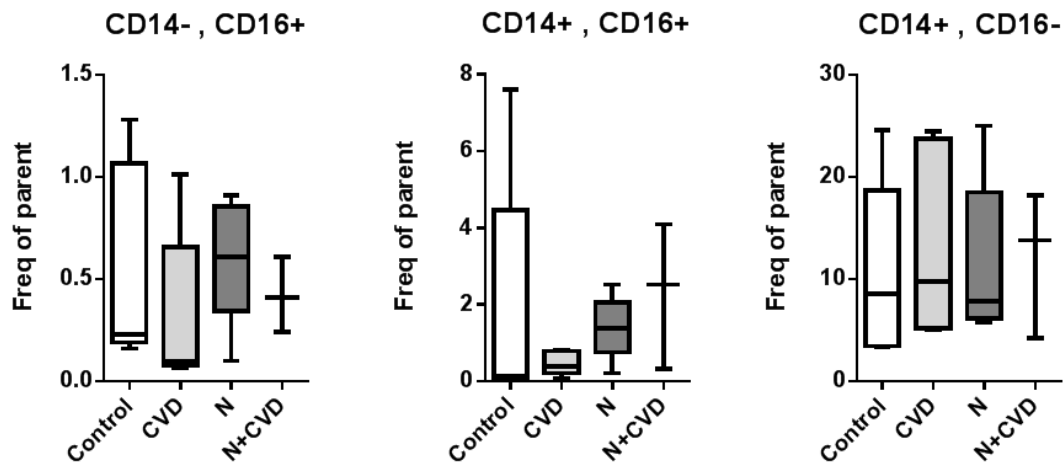

**Supplementary Figure 3.** Classical, intermediate and non-classical monocytes subsets from T2D patients with microvascular complications analysed based on CD14<sup>+</sup> and CD16<sup>+</sup> expression by FACs. (A) Monocyte subsets in total T2D group compared to healthy controls (B) Monocyte subsets in T2D patients with different vascular complications compared to healthy controls. Cardiovascular disease (CVD), nephropathy (N) and both, compared to healthy controls. Frequencies of parent (HLA-DR population) are plotted, Min to Max. Mann Whitney-U test (A) and One-way ANOVA (B) were used.

## S100A9

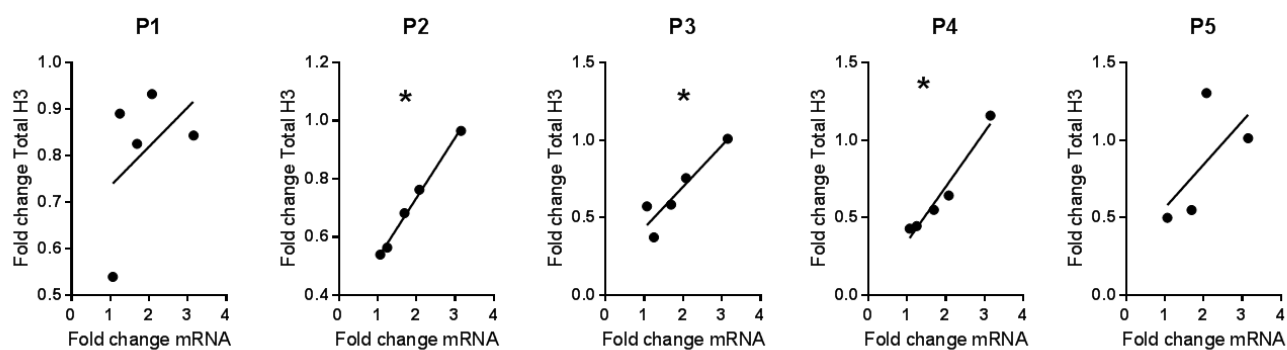

## S100A12

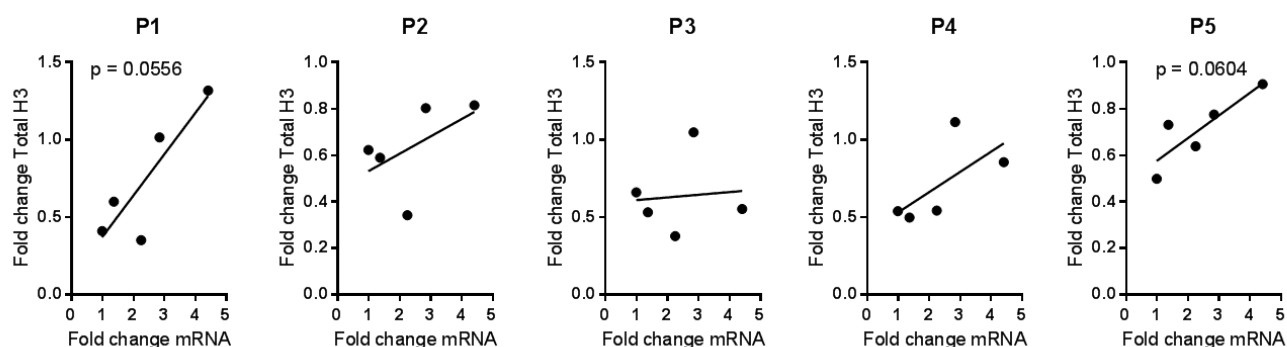

**Supplementary Figure 4.** Relation H3 occupancy and gene expression depends on promoter region in M1 macrophages. Linear regression of the histone mark association with fold change increase in gene expression (x-axis) with fold change increase of total H3 (y-axis) by culture under HG conditions. Correlation was shown for 5 single regions in promoters (P1 – P5) of *S100A9* (top) and *S100A12* (bottom). The correlation was considered to be statistically significant in case of \* $p < 0.05$  by linear regression analysis.

**A**

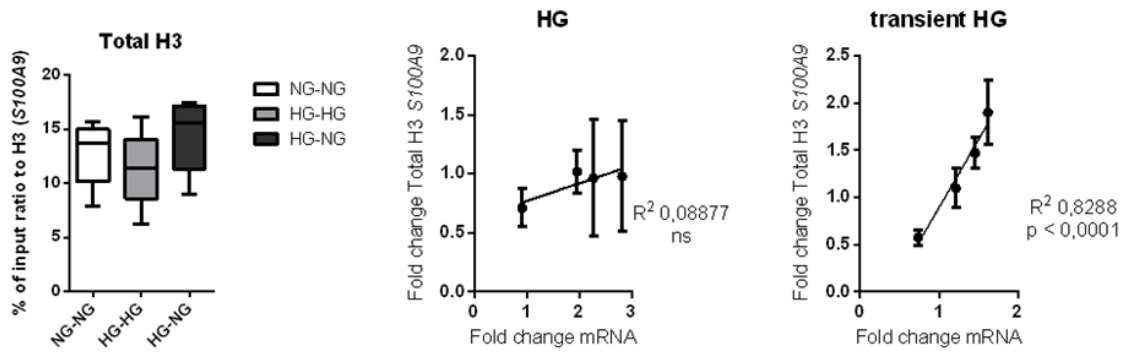

**B**

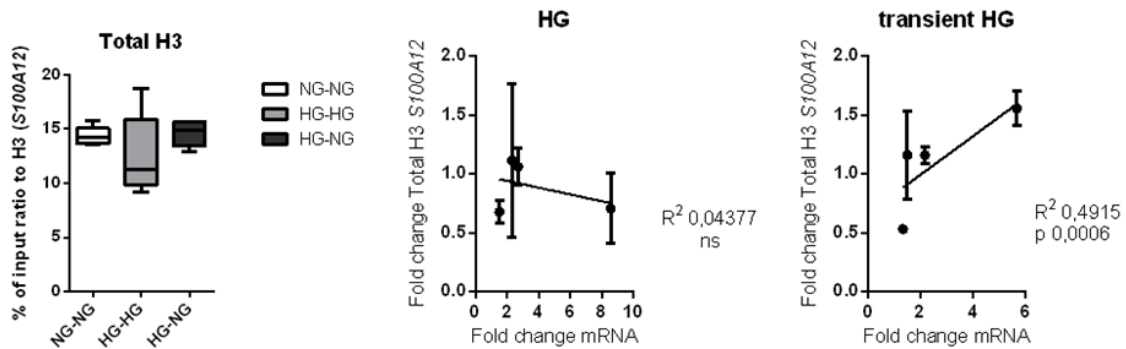

**Supplementary Figure 5.** Modifications of histones at promoter regions in transient hyperglycemia. Level of total H3 in *S100A9* (A) and *S100A12* (B) promoter regions, average of 5 regions, Min to Max plot and correlation of fold change increase in gene expression with increase of total H3 (n=4).

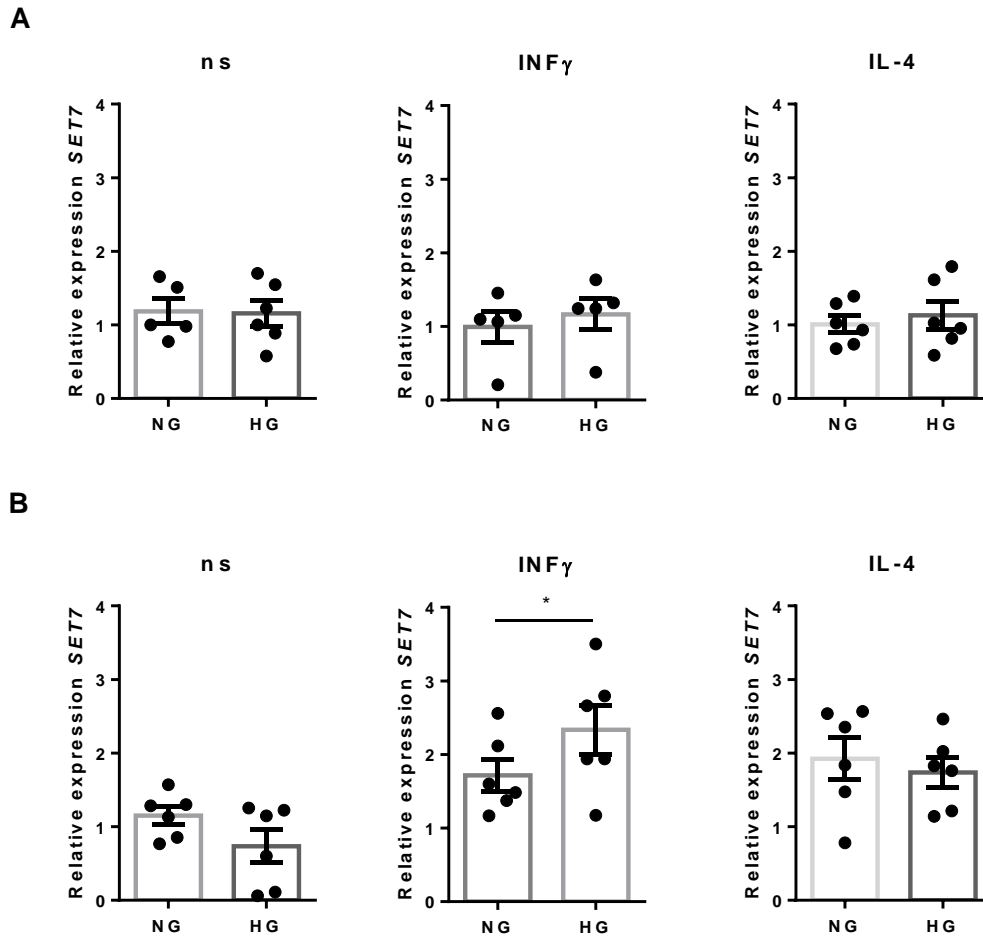

**Supplementary Figure 6.** Scatter plot with bar presenting individual donor data for main Figure 8. Relative expression of SET7 in primary human M0 ns, M1  $\text{INF}\gamma$  and M2 IL-4 macrophages after (A) 24h and (B) six days culture under NG and HG conditions. Data present mean  $\pm$  SEM normalised to 18SrRNA levels. Statistical analysis was tested by Two-way ANOVA,  $n = 6$ .

**Supplementary Table 1.** S100 gene family by affymetrix

| GeneSymbol | Fold<br>change<br>NS | Fold<br>change<br>IFN $\gamma$ | Fold<br>change<br>IL-4 | Adjusted<br>p-Value<br>for<br>Estimate<br>of NS | Adjusted<br>p-Value<br>for<br>Estimate<br>of IFN $\gamma$ | Adjusted<br>p-Value<br>for<br>Estimate<br>of IL-4 |
|------------|----------------------|--------------------------------|------------------------|-------------------------------------------------|-----------------------------------------------------------|---------------------------------------------------|
| S100A12    | 1,309409             | 4,411155                       | 1,055020               | 0,368051                                        | 0,000035*                                                 | 0,973707                                          |
| S100A10    | 1,080588             | 1,287492                       | 1,157048               | 0,478160                                        | 0,008734*                                                 | 0,421370                                          |
| S100Z      | 1,132830             | 1,658848                       | 1,089954               | 0,674781                                        | 0,024781*                                                 | 0,929235                                          |
| S100A4     | 1,051011             | 1,970927                       | 1,017411               | 0,894199                                        | 0,004853*                                                 | 0,993473                                          |
| S100A9     | 1,435917             | 2,130770                       | 1,019306               | 0,073179                                        | 0,000687*                                                 | 0,990445                                          |
| S100A16    | 1,954496             | 1,004997                       | 2,022121               | 0,020164*                                       | 0,990636                                                  | 0,088720                                          |
| S100A7L2   | 1,106120             | 1,023489                       | 1,049944               | 0,029907*                                       | 0,677327                                                  | 0,644794                                          |
| S100A8     | 3,193302             | 1,865075                       | 1,380401               | 0,003648*                                       | 0,066537                                                  | 0,728683                                          |

\*Every comparison is between cells cultured in high glucose conditions versus cells cultured in normal glucose conditions



**Supplementary Table 2.** Characteristics of individuals according to patient diagnosis

|                              | T1D (n=19)          | T2D (n=21)          | Prediabetic<br>(n=19) | Control<br>(n=21) |
|------------------------------|---------------------|---------------------|-----------------------|-------------------|
| Age (years)                  | 50,2 ± 18,1         | 59,7 ± 6,1          | 59,1 ± 7,6            | 57,9 ± 7,4        |
| Sex (women)                  | 56%                 | 48%                 | 47,4%                 | 57%               |
| Diabetes duration<br>(years) | 31,1 ± 14,4         | 9,7 ± 6,0           |                       |                   |
| Size (cm)                    | 172 ± 11            | 171 ± 10            | 171 ± 8               | 169 ± 10          |
| Weight (kg)                  | 79,8 ± 15,6         | 96,8 ± 19,6 *       | 97,8 ± 21,7 *         | 84,0 ± 18,2       |
| BMI (kg/m2)                  | 26,8 ± 4,3          | 31,4 ± 9,3          | 33,4 ± 7 *            | 29,2 ± 4,3        |
| Smoking (%)                  | 20,0                | 25,0                | 5,6                   | -                 |
| Retinopathy (%)              | 37,5 *              | 14,3                | 5,3                   | 4,8               |
| Polyneuropathy (%)           | 75,0 ***            | 76,2 ***            | -                     | -                 |
| Fasting glucose<br>(mg/dl)   | 177,2 ± 63,4<br>*** | 167,0 ± 52,2<br>*** | 106,7 ± 7,5 ***       | 90,2 ± 9,4        |
| HbA1c                        | 8,3 ± 1,6 ***       | 7,5 ± 1,2 ***       | 5,6 ± 0,4             | 5,5 ± 0,3         |
| eGFR                         |                     | 95,6 ± 13,3         | 87,8 ± 11,9           | 92,9 ± 14,5       |
| Urine Creatinine             | 91,9 ± 56,8         | 108,4 ± 63,3        | 130,5 ± 79,6          | 113,8 ± 57,2      |
| Urine Albumin                | 39,9 ± 67,5         | 88,8 ± 137,8 *      | 13,9 ± 11,1           | 8,3 ± 4,0         |
| U_ACR                        | 16,0 ± 18,4         | 22,0 ± 27,4         | 2,9                   |                   |
| Nephropathy (%)              | 17,6 *              | 52,4 ***            | 11                    | -                 |
| NSS                          | 4,0 ± 2,6           | 6,2 ± 2,5           |                       |                   |
| NDS                          | 4,1 ± 3,0           | 4,5 ± 2,8           |                       |                   |

Values represent mean ± SD or percentages (%). Control vs. other groups \*p < 0.05, \*\*p < 0.01 \*\*\* p < 0.001. BMI – Body Mass Index, eGFR - Estimated Glomerular Filtration Rate, ACR - albumin/creatinine ratio, NSS - Neuropathy Symptoms Score, NDS - Neuropathy Disability Score.

**Supplementary Table 3.** Correlation between S100A9 and S100A12 expression in monocytes from healthy controls, prediabetic individuals and diabetic patients, normalized to CD14 expression.

*Patient PBMCs normalized to CD14+*

|         | <i>Control</i> | <i>Prediabetic</i> | <i>T1D</i>  | <i>T2D</i>  |
|---------|----------------|--------------------|-------------|-------------|
| $R^2$   | 0,8091         | 0,1403             | 0,878       | 0,9778      |
| p value | < 0,0001***    | 0,169              | < 0,0001*** | < 0,0001*** |

**Supplementary Table 4.** Clinical characteristics of the patients and control individuals.

| Variable                       | Healthy controls (n=5) | T2D with complications (n=13) |
|--------------------------------|------------------------|-------------------------------|
| Age (years)                    | 54,0 ± 12,1            | 67,4 ± 10,8                   |
| Sex (%female)                  | 100%                   | 42%                           |
| BMI (kg/m2)                    | 25,1 ± 2,4             | 31,5 ± 6,1                    |
| Waist circumference (cm)       | 85,4 ± 3,4             | 111,6 ± 14,2                  |
| Current smoke (%)              | 20%                    | 16%                           |
| Hypertension                   | 0%                     | 83%                           |
| Cardiovascular disease (%)     | 0%                     | 67%                           |
| Cholesterol (mg/dl) (mmol/l)   | 200,0 ± 46,0           | 196,2 ± 60,2                  |
| HDL (mg/dl) (mmol/l)           | 71,2 ± 29,6            | 44,5 ± 10,3                   |
| LDL (mg/dl) (mmol/l)           | 114,8 ± 26,4           | 107,8 ± 49,4                  |
| Triglycerides (mg/dl) (mmol/l) | 70,6 ± 39,0            | 304,2 ± 389,1                 |
| Glucose (mg/dl) (mmol/l)       | 89,8 ± 7,4             | 192,9 ± 101,4                 |
| HbA1c (%) (mmol/l)             | 5,4 ± 0,1              | 7,9 ± 1,4                     |

Values represent mean ± SD or percentages (%). Control vs. other groups \*p < 0.05, \*\*p < 0.01 \*\*\* p < 0.001. BMI – Body Mass Index, HDL - High-density-lipoprotein, LDL – Low-density-lipoprotein, HbA1c - Hemoglobine A1c

**Supplementary Table 5. Key Resource Table**

| REAGENT or RESOURCE                                    | CLONE           | SOURCE                    | IDENTIFIER      |
|--------------------------------------------------------|-----------------|---------------------------|-----------------|
| <i>Antibodies</i>                                      |                 |                           |                 |
| CD16 APC                                               | eBIOCB16 (CB16) | eBiosciences              | Cat#17-0168-42  |
| CD3 FITC                                               | UCHT1           | Biolegend                 | Cat#300406      |
| CD19                                                   | H1B19           | Biolegend                 | Cat#555412      |
| CD56 FITC                                              | 5.1H11          | Biolegend                 | Cat#362546      |
| CD14 FITC                                              | 6103            | Biolegend                 | Cat#11-0149-42  |
| MHC II (HLA DR) PE/Cy7                                 | L243            | Biolegend                 | Cat#307616      |
| Mouse monoclonal S100A9 antibody                       | MRP 1H9         | Biolgend                  | Cat#350706      |
| Mouse monoclonal S100A12 anitbody                      | 161205          | R&D Systems               | Cat#1508105     |
| Mouse monoclonal S100A8 antibody                       | 749916          | R&D Systems               | Cat#MAB4570     |
| Sheep polyclonal S100A9 antibody                       |                 | R&D Systems               | Cat#AF5578      |
| Goat polyclonal S100A12 antibody                       |                 | R&D Systems               | Cat#AF1052      |
| Rabbit polyclonal SET7/SET9 antibody                   |                 | Cell Signaling            | Cat#2813        |
| Rabbit polyclonal Histone H3 (mono methyl K4) antibody |                 | Abcam                     | Cat#8895        |
| Rabbit polyclonal Trimethyl-Histone H3 (Lys4) antibody |                 | Merck Millipore           | Cat#07-473      |
| Rabbit polyclonal Acetyl-Histone H3 Antibody           |                 | Merck Millipore           | Cat#06-599      |
| Histone H3 Rabbit mAb                                  | D2B12           | Cell Signaling            | Cat#4620        |
| <i>Chemicals, Peptides, and Recombinant Proteins</i>   |                 |                           |                 |
| fixable viability dye                                  |                 | Invitrogen                | Cat#65-0865-14  |
| FcR Blocking Reagent human                             |                 | Miltenyi Biotec           | Cat#130-059-901 |
| Recombinant Human M-CSF                                |                 | Peprtech                  | Cat#300-25B     |
| Recombinant Human Interferon gamma                     |                 | Peprtech                  | Cat#300-02B     |
| Recombinant Human IL-4                                 |                 | Peprtech                  | Cat#200-04B     |
| D-(+)-Glucose solution                                 |                 | Merck Sigma               | Cat#G8644       |
| PFI-2 hydrochloride                                    |                 | MedChemExpress            | Cat#HY-18627A   |
| EPZ031686                                              |                 | MedChemExpress            | Cat#HY-19324    |
| WDR5 0103                                              |                 | R&D Systems               | Cat#5323/10     |
| <i>Critical Commercial Assays</i>                      |                 |                           |                 |
| E.Z.N.A. Total RNA Kit I                               |                 | Omega bio-tek             | Cat#R6834-02    |
| QIAquick PCR Purification Kit                          |                 | Qiagen                    | Cat#28104       |
| SimpleChIP® Enzymatic Chromatin IP Kit                 |                 | Cell Signaling Technology | Cat#9003        |
| Human S100A9 DuoSet ELISA                              |                 | R&D systems               | Cat#DY5578      |
| Human EN-RAGE DuoSet ELISA                             |                 | R&D systems               | Cat#DY1052-05   |
